# Supplementary material
Source: PubMed Central journal article supplement (PMC6462309)
Supplement: NIHMS1019101-supplement-Supplemental_Tables_1_and_Table_2.pdf [file NIHMS1019101-supplement-Supplemental_Tables_1_and_Table_2.pdf]

**Supplemental Table 1** Sequences of oligonucleotide primers used for RT-PCR-based analysis of integrin subunit gene expression.

| Subunit | Gene | Accession Number | Primers      | Amplicon size (bp)                                                              | ECM Interaction                                                                |                                                   |
|---------|------|------------------|--------------|---------------------------------------------------------------------------------|--------------------------------------------------------------------------------|---------------------------------------------------|
| α       | 1    | <i>Itga1</i>     | NM_001033228 | Forward: 5'-CGTCTCAGATGAGTTGGCCC-3'<br>Reverse: 5'-GCATGACCCAGTCCTGTGAAT-3'     | 155                                                                            | Collagen; Laminin                                 |
|         | 2    | <i>Itga2</i>     | NM_008396    | Forward: 5'-TGC GGCTGCTAATGCTAGTT-3'<br>Reverse: 5'-CCAGTAGCCAGTTGCCTTGT-3'     | 150                                                                            | Collagen; Laminin                                 |
|         | 3    | <i>Itga3</i>     | NM_013565    | Forward: 5'-ATCGGCAGACTGAGCGACAA-3'<br>Reverse: 5'-GGTCAGGGTCACTTTTCTCTGAA-3'   | 171                                                                            | Laminin                                           |
|         | 5    | <i>Itga5</i>     | NM_010577    | Forward: 5'-TCCAGTGCACCACCATTCAA-3'<br>Reverse: 5'-GGAGCACATGCCAAGATGGA-3'      | 157                                                                            | RGD-binding; Fibronectin                          |
|         | 6    | <i>Itga6</i>     | NM_008397    | Forward: 5'-TTGATCTACTTCCATAATTGTGTGG-3'<br>Reverse: 5'-TTCCACTTGGTGATCCACTG-3' | 160                                                                            | Laminin                                           |
|         | 8    | <i>Itga8</i>     | NM_001001309 | Forward: 5'-ACACGTTCTCAAGAGAAAGAATG-3'<br>Reverse: 5'-ACATTCGGAGTGGCCCAAT-3'    | 151                                                                            | RGD-binding; Fibronectin; Vitronectin             |
|         | 9    | <i>Itga9</i>     | NM_133721    | Forward: 5'-AGCACTCCACGACAACACG-3'<br>Reverse: 5'-AGTCCTCCCTCGAGCCATGT-3'       | 161                                                                            | VCAM-1                                            |
|         | 10   | <i>Itga10</i>    | NM_001081053 | Forward: 5'-CATGGTGGCATGCACAGAAG-3'<br>Reverse: 5'-ACCGCAATCCCATAACGTGT-3'      | 165                                                                            | Collagen; Laminin                                 |
|         | 11   | <i>Itga11</i>    | NM_176922    | Forward: 5'-AGCCTTTGGCCAGGATTCAC-3'<br>Reverse: 5'-ATTGGTTTCCATTGGGGCAC-3'      | 156                                                                            | Collagen                                          |
|         | V    | <i>ItgaV</i>     | NM_008402    | Forward: 5'-GGTCGCCTATCTTCGGGATG-3'<br>Reverse: 5'-ATATGAGCCTGCCGACTGAC-3'      | 162                                                                            | RGD-binding; Fibrinogen; Fibronectin; Vitronectin |
|         | β    | 1                | <i>Itgb1</i> | NM_010578                                                                       | Forward: 5'-TTGCAACTGGTTTCTGGATTG-3'<br>Reverse: 5'-CATTCTTCTTGCAAAATGTCGTA-3' | 168                                               |
| 3       |      | <i>Itgb3</i>     | NM_016780    | Forward: 5'-CAGTGGCCGGGACAACCTC-3'<br>Reverse: 5'-GACAAAGTCTCATCTGAGCACCA-3'    | 161                                                                            | RGD-binding; Fibrinogen; Fibronectin; Vitronectin |
| 4       |      | <i>Itgb4</i>     | NM_001005608 | Forward: 5'-CCAAGGCCTCCCTCTATCT-3'<br>Reverse: 5'-CACGGGAATCTGTACCCAG-3'        | 173                                                                            | Laminin                                           |
| 5       |      | <i>Itgb5</i>     | NM_010580    | Forward: 5'-AATGTGGAAGTGCCECAAT-3'<br>Reverse: 5'-TTTGAGGCTTTGGAAGTTGGC-3'      | 146                                                                            | RGD-binding; Vitronectin                          |

**Supplemental Table 2** Complete gene expression dataset from analysis of hOSCs obtained from ovaries of three different subjects using the Human Integrin Signaling Primer Library (see text for details; N.D., not detected).

|    |                 | <b>Subject 1<br/>AVG Ct</b> | <b>Subject 2<br/>AVG Ct</b> | <b>Subject 3<br/>AVG Ct</b> |
|----|-----------------|-----------------------------|-----------------------------|-----------------------------|
| 1  | <b>ADAMTS1</b>  | 27.41467381                 | 27.6806345                  | 33.7854538                  |
| 2  | <b>ADAMTS13</b> | 40.40980721                 | N.D.                        | 40.51681773                 |
| 3  | <b>ADAMTS8</b>  | 38.81850815                 | 42.00947571                 | 39.98692576                 |
| 4  | <b>CD44</b>     | 40.63974762                 | 36.56976128                 | 37.14239502                 |
| 5  | <b>CDH1</b>     | N.D.                        | N.D.                        | N.D.                        |
| 6  | <b>CNTN1</b>    | 33.44672394                 | 38                          | 40.3211085                  |
| 7  | <b>COL11A1</b>  | N.D.                        | N.D.                        | N.D.                        |
| 8  | <b>COL12A1</b>  | 27.77831936                 | 26.74600887                 | 40.91740227                 |
| 9  | <b>COL14A1</b>  | N.D.                        | 38.69775963                 | 41.81606547                 |
| 10 | <b>COL15A1</b>  | 29.30886459                 | 27.79452229                 | N.D.                        |
| 11 | <b>COL16A1</b>  | N.D.                        | N.D.                        | 39.05307134                 |
| 12 | <b>COL1A1</b>   | 21.48907471                 | 18.82833576                 | 33.90632502                 |
| 13 | <b>COL4A2</b>   | 27.39070892                 | 24.43215847                 | N.D.                        |
| 14 | <b>COL5A1</b>   | 28.89126968                 | 26.15433979                 | 37.03794098                 |
| 15 | <b>COL6A1</b>   | 25.91304111                 | 24.22719002                 | N.D.                        |
| 16 | <b>COL6A2</b>   | 26.29365063                 | 24.30940628                 | 34.65966543                 |
| 17 | <b>COL7A1</b>   | 32.30583382                 | 28.90729618                 | 43.3400383                  |
| 18 | <b>COL8A1</b>   | 28.28013325                 | 28.05765343                 | 40.91039658                 |
| 19 | <b>CTGF</b>     | N.D.                        | 21.57390022                 | 32.20464516                 |
| 20 | <b>CTNNA1</b>   | 27.84682655                 | 25.20577335                 | N.D.                        |
| 21 | <b>CTNNB1</b>   | 30.46445274                 | 26.84480953                 | N.D.                        |
| 22 | <b>CTNND1</b>   | 27.56139088                 | 25.55162716                 | N.D.                        |
| 23 | <b>CTNND2</b>   | N.D.                        | N.D.                        | N.D.                        |
| 24 | <b>ECM1</b>     | 26.42483425                 | 24.38460636                 | 37.80217107                 |
| 25 | <b>FN1</b>      | 22.30268478                 | 21.67366695                 | 38.93711853                 |
| 26 | <b>HAS1</b>     | 33.34583473                 | 29.95589828                 | 32.81475703                 |
| 27 | <b>ICAM1</b>    | 38.40436363                 | 31.2388649                  | N.D.                        |
| 28 | <b>ITGA1</b>    | 29.14361954                 | 27.43858051                 | 39.36660512                 |
| 29 | <b>ITGA10</b>   | 35.85592461                 | 34.47157669                 | N.D.                        |
| 30 | <b>ITGA11</b>   | 27.76153278                 | 25.49538517                 | N.D.                        |
| 31 | <b>ITGA2</b>    | 30.67304993                 | 25.59008121                 | 41.25695546                 |
| 32 | <b>ITGA3</b>    | 26.99559593                 | 24.98432446                 | N.D.                        |
| 33 | <b>ITGA4</b>    | 33.52968407                 | 29.92076206                 | N.D.                        |
| 34 | <b>ITGA5</b>    | 25.38027                    | 22.33900738                 | 33.64046987                 |
| 35 | <b>ITGA6</b>    | 29.48524952                 | 27.87346268                 | 30.83618228                 |
| 36 | <b>ITGA7</b>    | 30.10532951                 | 34.02077484                 | N.D.                        |
| 37 | <b>ITGA8</b>    | N.D.                        | N.D.                        | N.D.                        |

|    |        |             |             |             |
|----|--------|-------------|-------------|-------------|
| 38 | ITGA9  | 39.55936432 | N.D.        | 38.72490692 |
| 39 | ITGAD  | 41.08642197 | 42.17032242 | N.D.        |
| 40 | ITGAL  | N.D.        | N.D.        | N.D.        |
| 41 | ITGAM  | 37.4405117  | 38.68480873 | 37.7244606  |
| 42 | ITGAV  | 31.51955223 | 28.98326397 | 40.6280543  |
| 43 | ITGAX  | N.D.        | N.D.        | N.D.        |
| 44 | ITGB1  | 25.49896145 | 21.80442619 | 40.39399465 |
| 45 | ITGB2  | N.D.        | N.D.        | N.D.        |
| 46 | ITGB3  | 32.22757149 | 29.16346359 | 39.35725403 |
| 47 | ITGB4  | N.D.        | N.D.        | 41.43833923 |
| 48 | ITGB5  | 25.33196163 | 22.45533752 | N.D.        |
| 49 | ITGB6  | 40.36738205 | 44.42711639 | N.D.        |
| 50 | ITGB7  | 44.49920082 | 40.67804718 | N.D.        |
| 51 | ITGB8  | 35.69527817 | 31.95185184 | 40.36690903 |
| 52 | LAMA1  | N.D.        | N.D.        | N.D.        |
| 53 | LAMA2  | 38.27819252 | 33.00093269 | 41.12493261 |
| 54 | LAMA3  | N.D.        | 34.72609138 | 34.54503886 |
| 55 | LAMB1  | 29.86603928 | 25.26217461 | 35.92848714 |
| 56 | LAMB3  | 29.40347385 | N.D.        | 29.17305692 |
| 57 | LAMC1  | 25.86340714 | 24.1226759  | 32.60261345 |
| 58 | MMP1   | 35.19607925 | 29.58448696 | N.D.        |
| 59 | MMP10  | N.D.        | 32.73882103 | 40.09152985 |
| 60 | MMP11  | 34.25201797 | 30.14136124 | 39.07869848 |
| 61 | MMP12  | N.D.        | N.D.        | N.D.        |
| 62 | MMP13  | N.D.        | N.D.        | 43.36028926 |
| 63 | MMP14  | 29.0438509  | 25.2464304  | N.D.        |
| 64 | MMP15  | 34.22304726 | 30.24384403 | 39.495224   |
| 65 | MMP16  | 39.52402306 | 31.88394547 | N.D.        |
| 66 | MMP2   | 25.14005375 | 22.15215874 | N.D.        |
| 67 | MMP3   | 39.28055191 | 31.31312943 | 40.94088936 |
| 68 | MMP7   | N.D.        | N.D.        | N.D.        |
| 69 | MMP8   | 31.22769165 | 30.47565937 | 30.73464203 |
| 70 | MMP9   | 30.94835472 | 31.31786251 | 31.48891322 |
| 71 | NCAM1  | 30.62191868 | N.D.        | 30.46897825 |
| 72 | PECAM1 | 40.07981873 | 33.22755623 | 39.71215439 |
| 73 | SELE   | 42.93828011 | 40.83924103 | 42.30531947 |
| 74 | SELL   | N.D.        | N.D.        | N.D.        |
| 75 | SELP   | 44.54564285 | 44.10116386 | N.D.        |
| 76 | SGCE   | N.D.        | N.D.        | N.D.        |
| 77 | SPARC  | 25.06023407 | 21.73928738 | N.D.        |
| 78 | SPG7   | 28.22570229 | 26.07788086 | N.D.        |
| 79 | SPP1   | 34.21493721 | 31.23020077 | 41.48914337 |
| 80 | TGFBI  | 26.1281805  | 21.73746586 | 37.23967234 |
| 81 | THBS1  | 22.42714024 | 20.7059145  | N.D.        |
| 82 | THBS2  | 27.16267395 | 23.18884659 | N.D.        |
| 83 | THBS3  | 31.52537441 | 30.51323605 | N.D.        |
| 84 | TIMP1  | 23.76430988 | 22.06893063 | 35.32013448 |
| 85 | TIMP2  | 26.30201721 | 23.57567692 | 35.72195689 |
| 86 | TNC    | 29.87750626 | N.D.        | 38.52669907 |

|    |               |             |             |             |
|----|---------------|-------------|-------------|-------------|
| 87 | <b>VCAM1</b>  | 44.77254677 | 41.80959511 | N.D.        |
| 88 | <b>VCAN</b>   | 29.95798969 | 26.08685017 | N.D.        |
| 89 | <b>ACTB</b>   | 21.87595558 | 19.42754841 | 36.67889404 |
| 90 | <b>B2M</b>    | 22.97931004 | 20.16807652 | 42.88169479 |
| 91 | <b>GAPDH</b>  | 22.27002048 | 20.80181313 | 36.71473694 |
| 92 | <b>GUSB</b>   | 30.45147705 | 27.78578854 | 34.55851237 |
| 93 | <b>HPRT1</b>  | 28.57710743 | 26.41437626 | 37.44387945 |
| 94 | <b>PGK1</b>   | 26.05697727 | 23.855896   | 33.50720215 |
| 95 | <b>PPIA</b>   | 22.8799057  | 20.84195518 | 37.0544103  |
| 96 | <b>PRL13A</b> | 24.66719818 | 22.00007629 | 41.7089297  |
